# Supplementary figures and images for: Emerging trends and focus of research on the relationship between traumatic brain injury and gut microbiota: a visualized study
Source: Frontiers journal article supplement (doi:10.3389/fmicb.2023.1278438), 2023-11-03

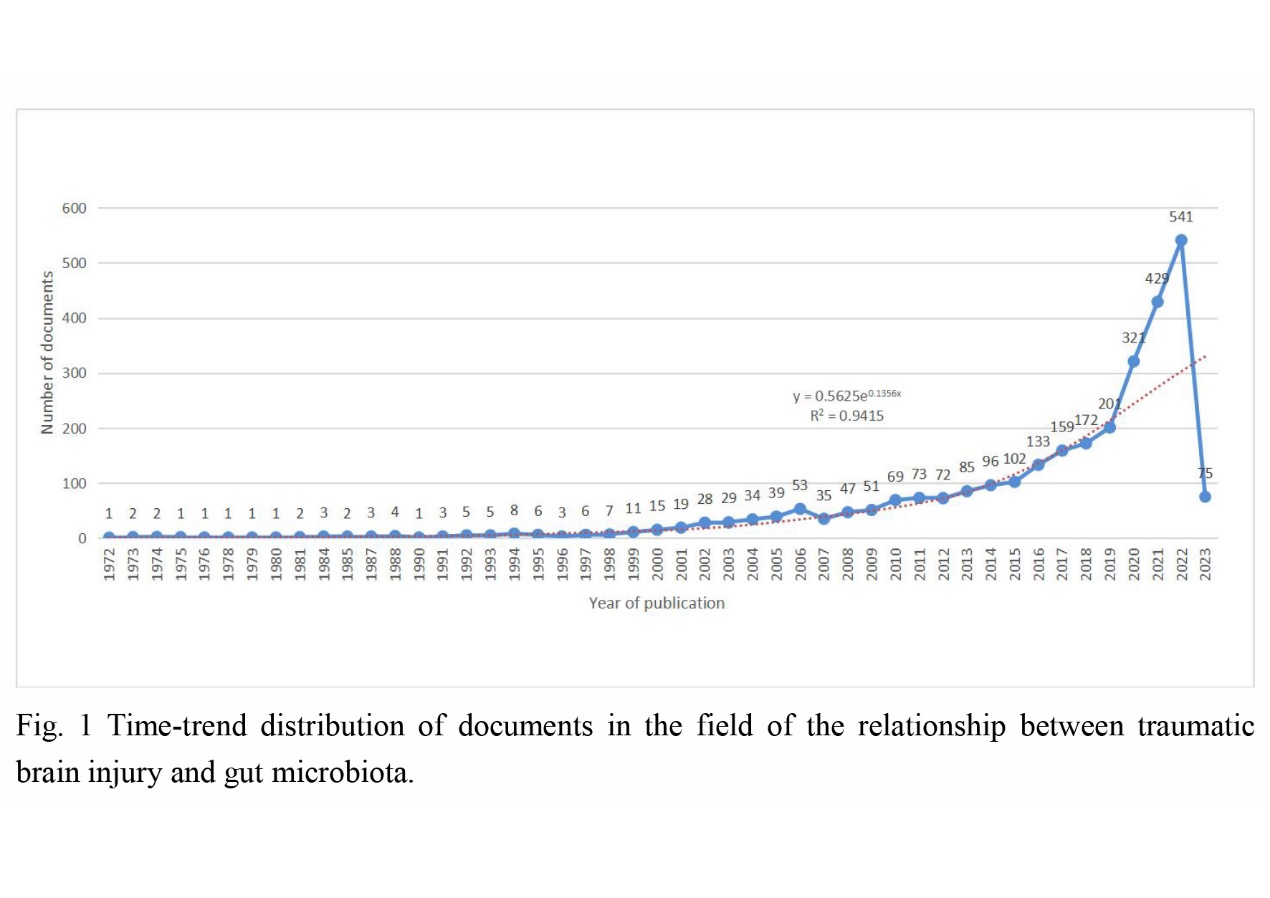

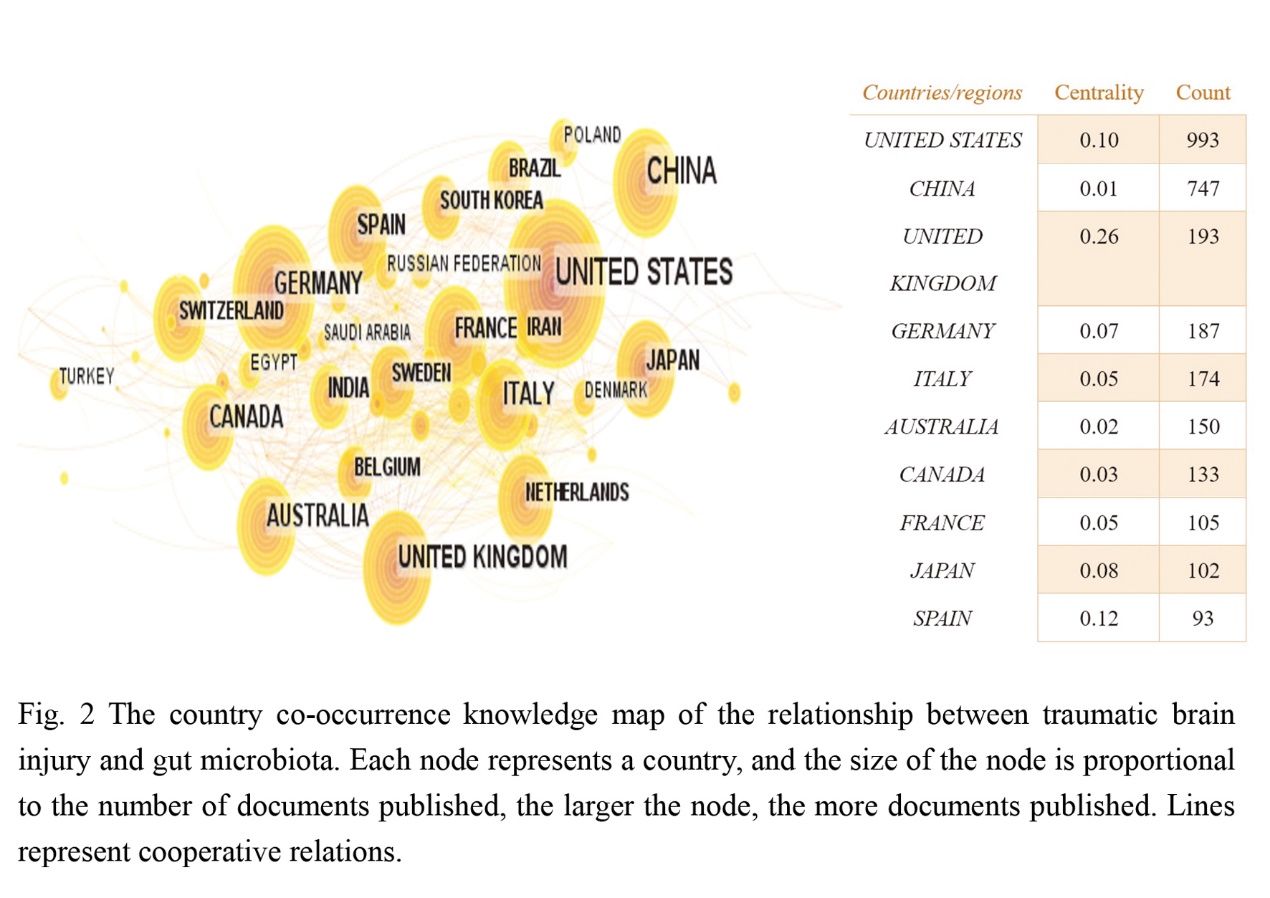

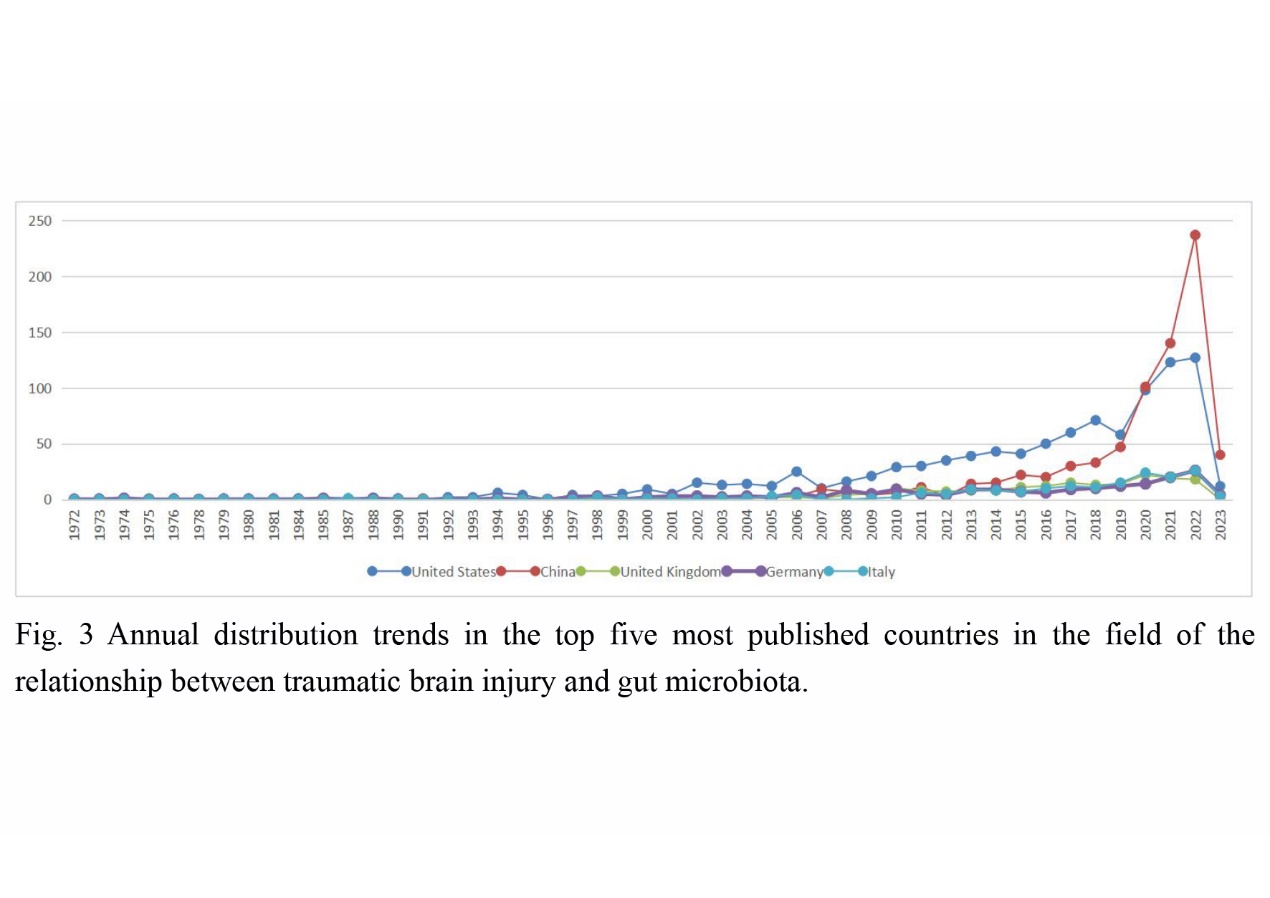

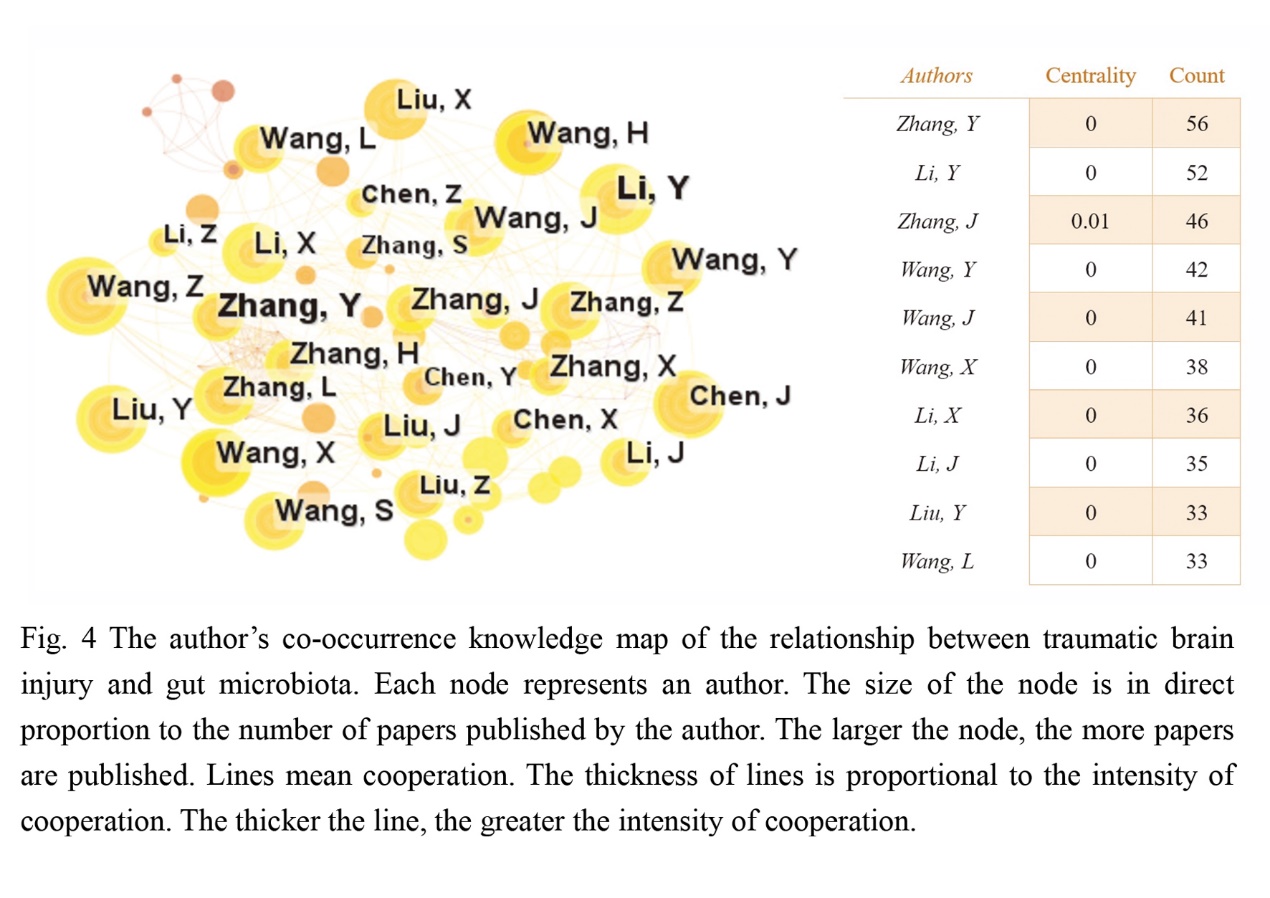

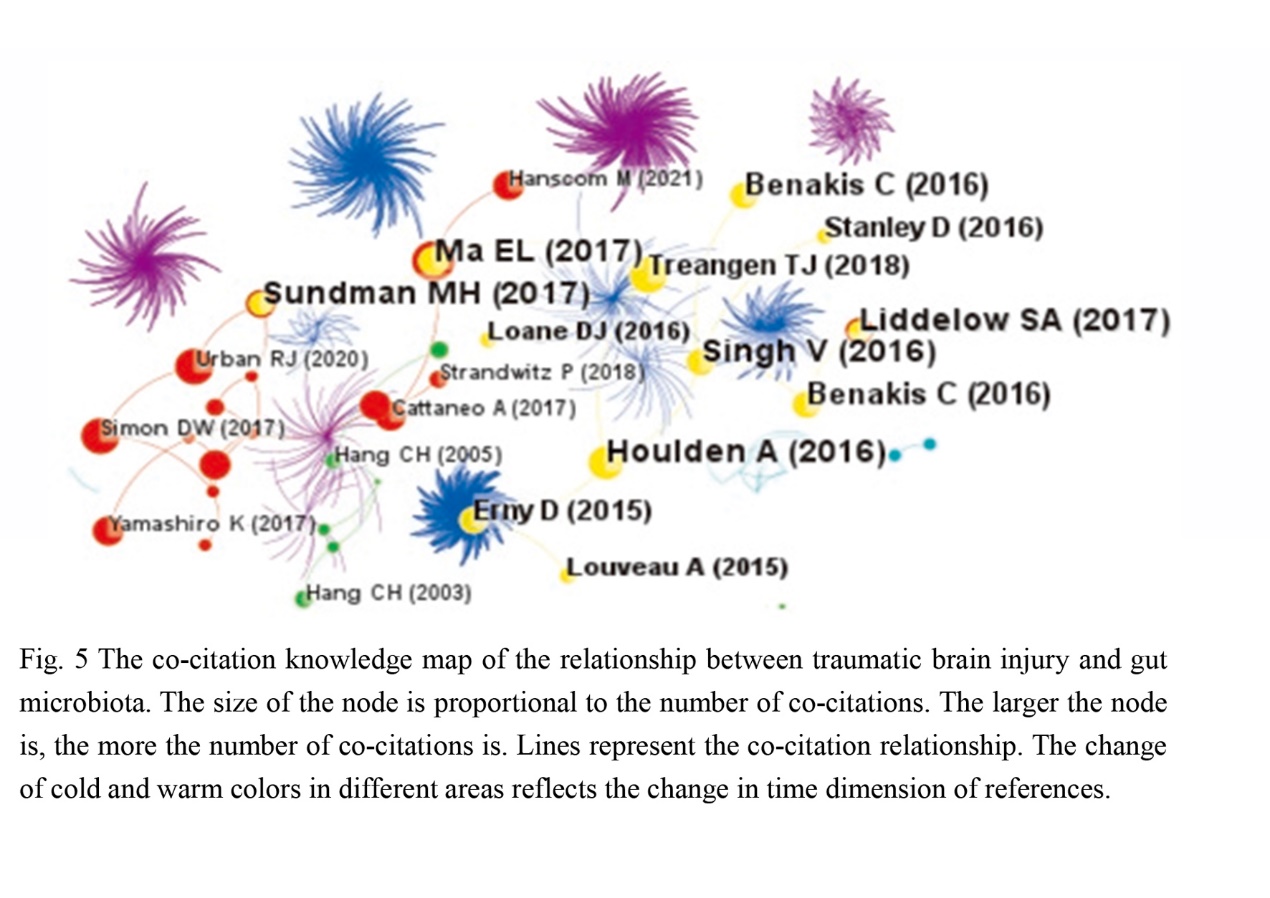

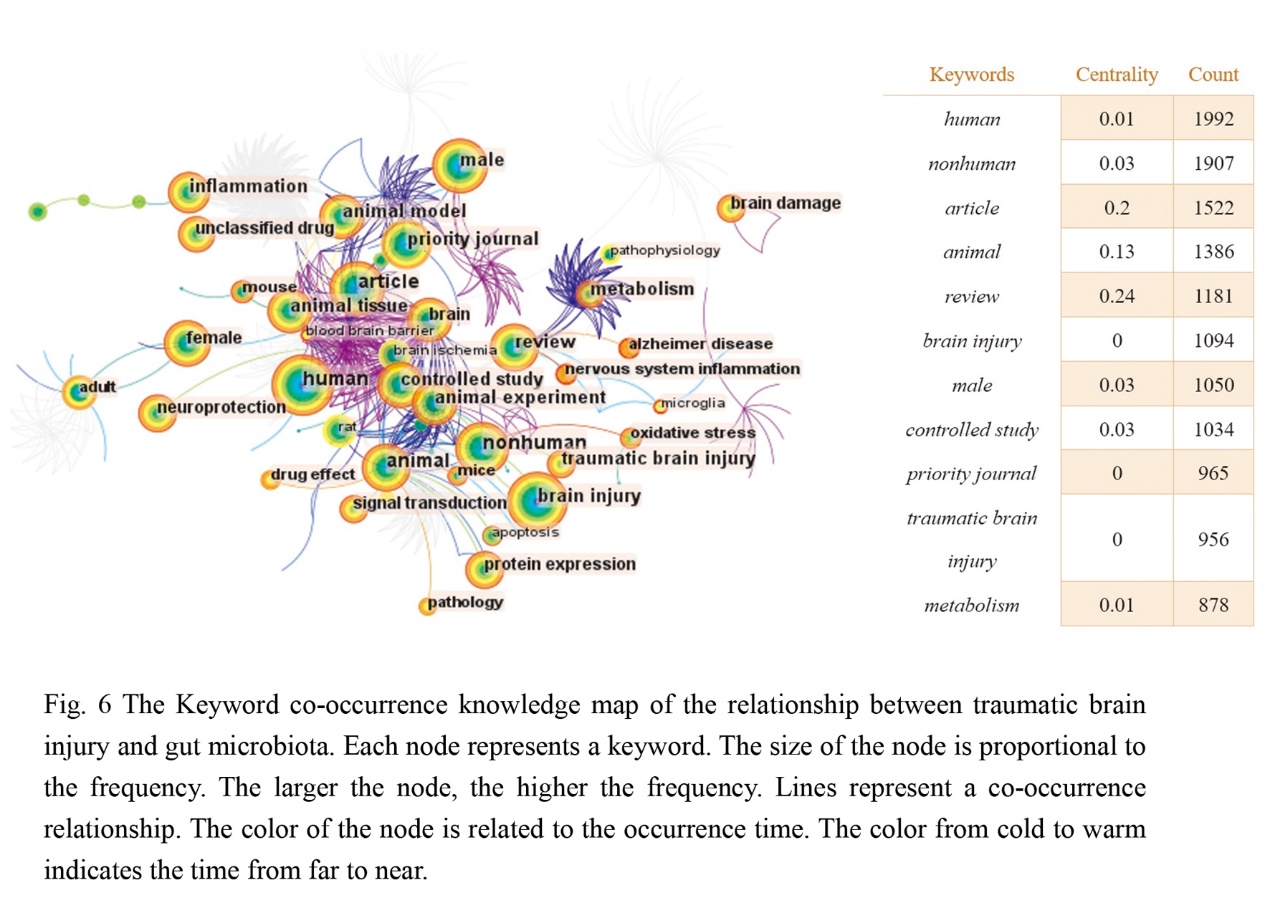

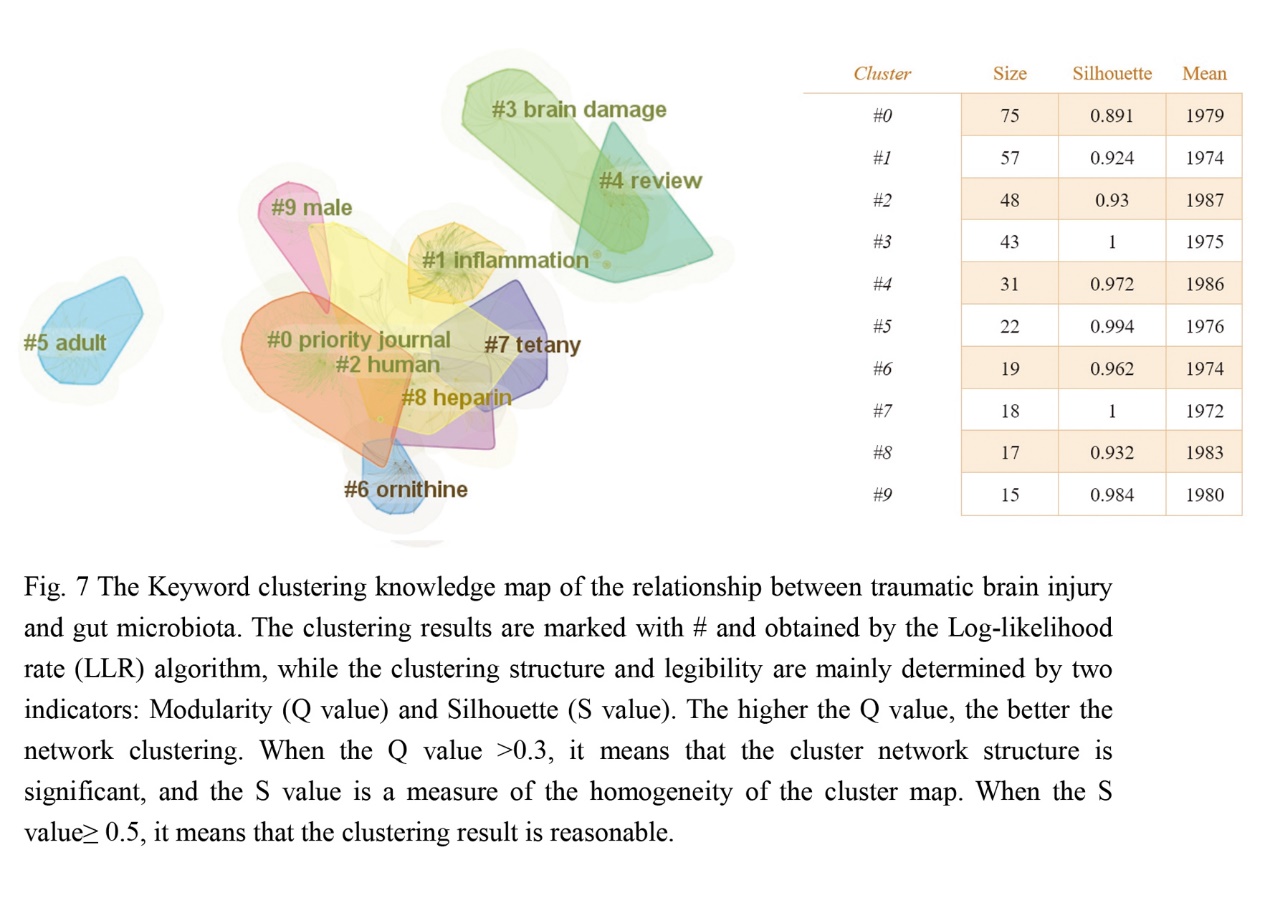


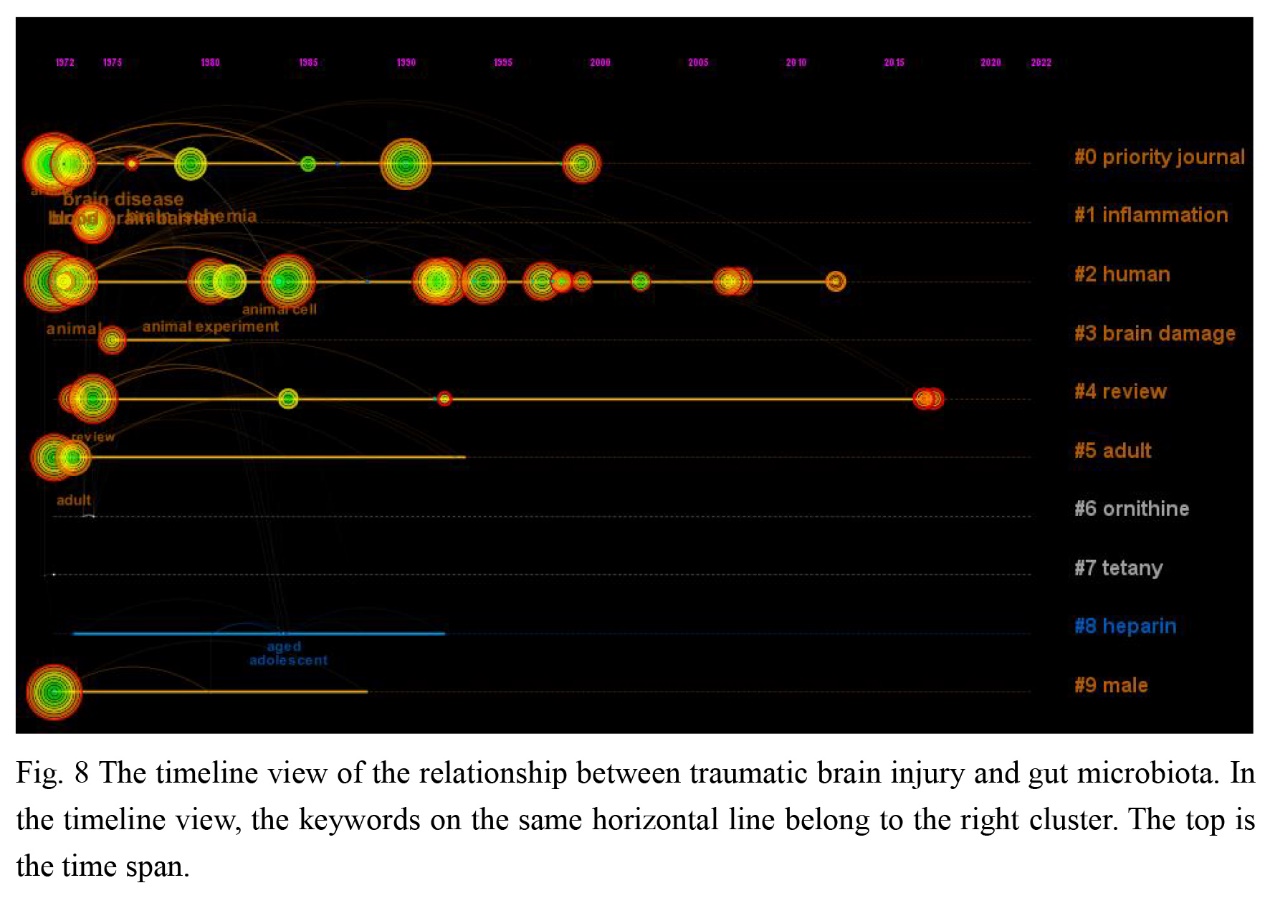

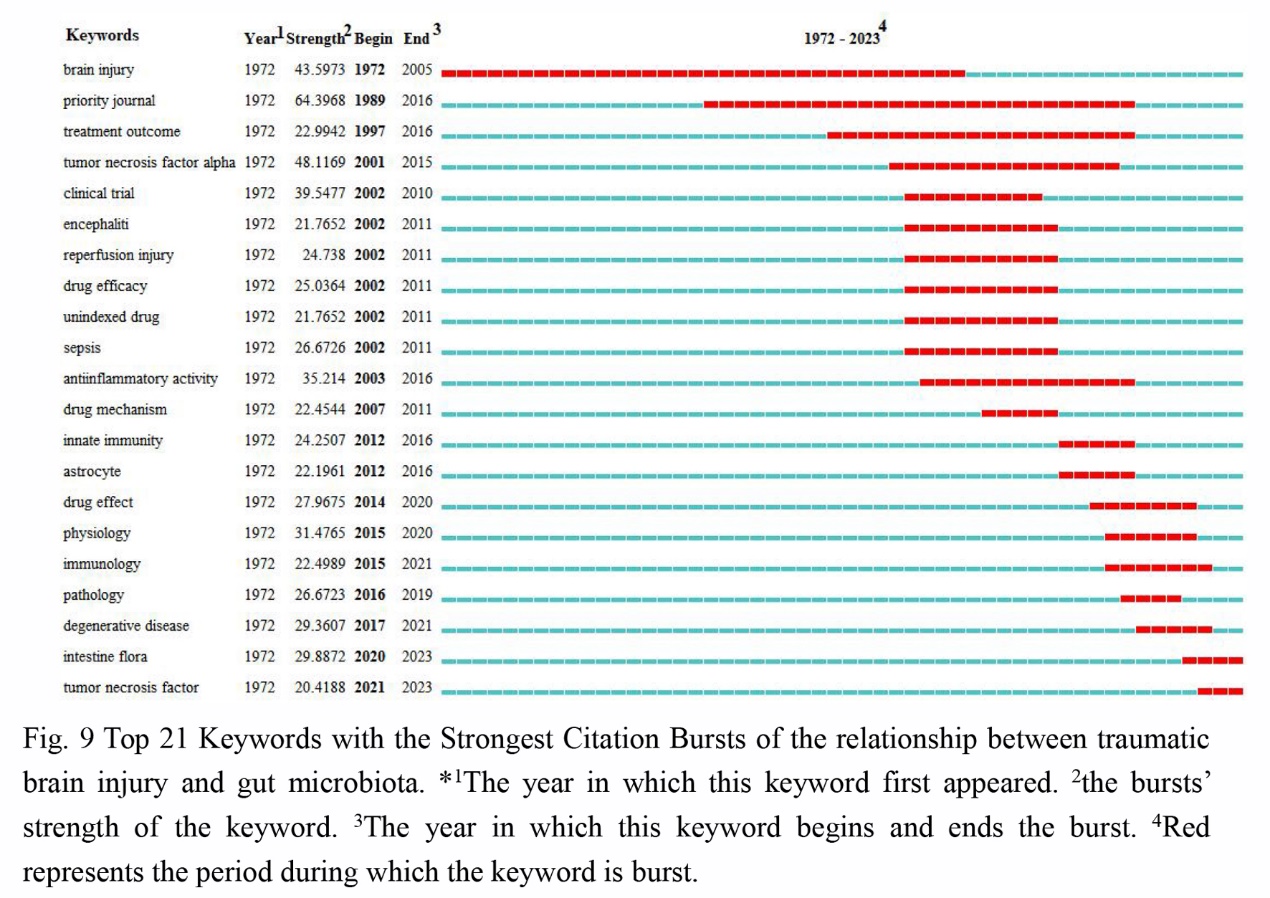

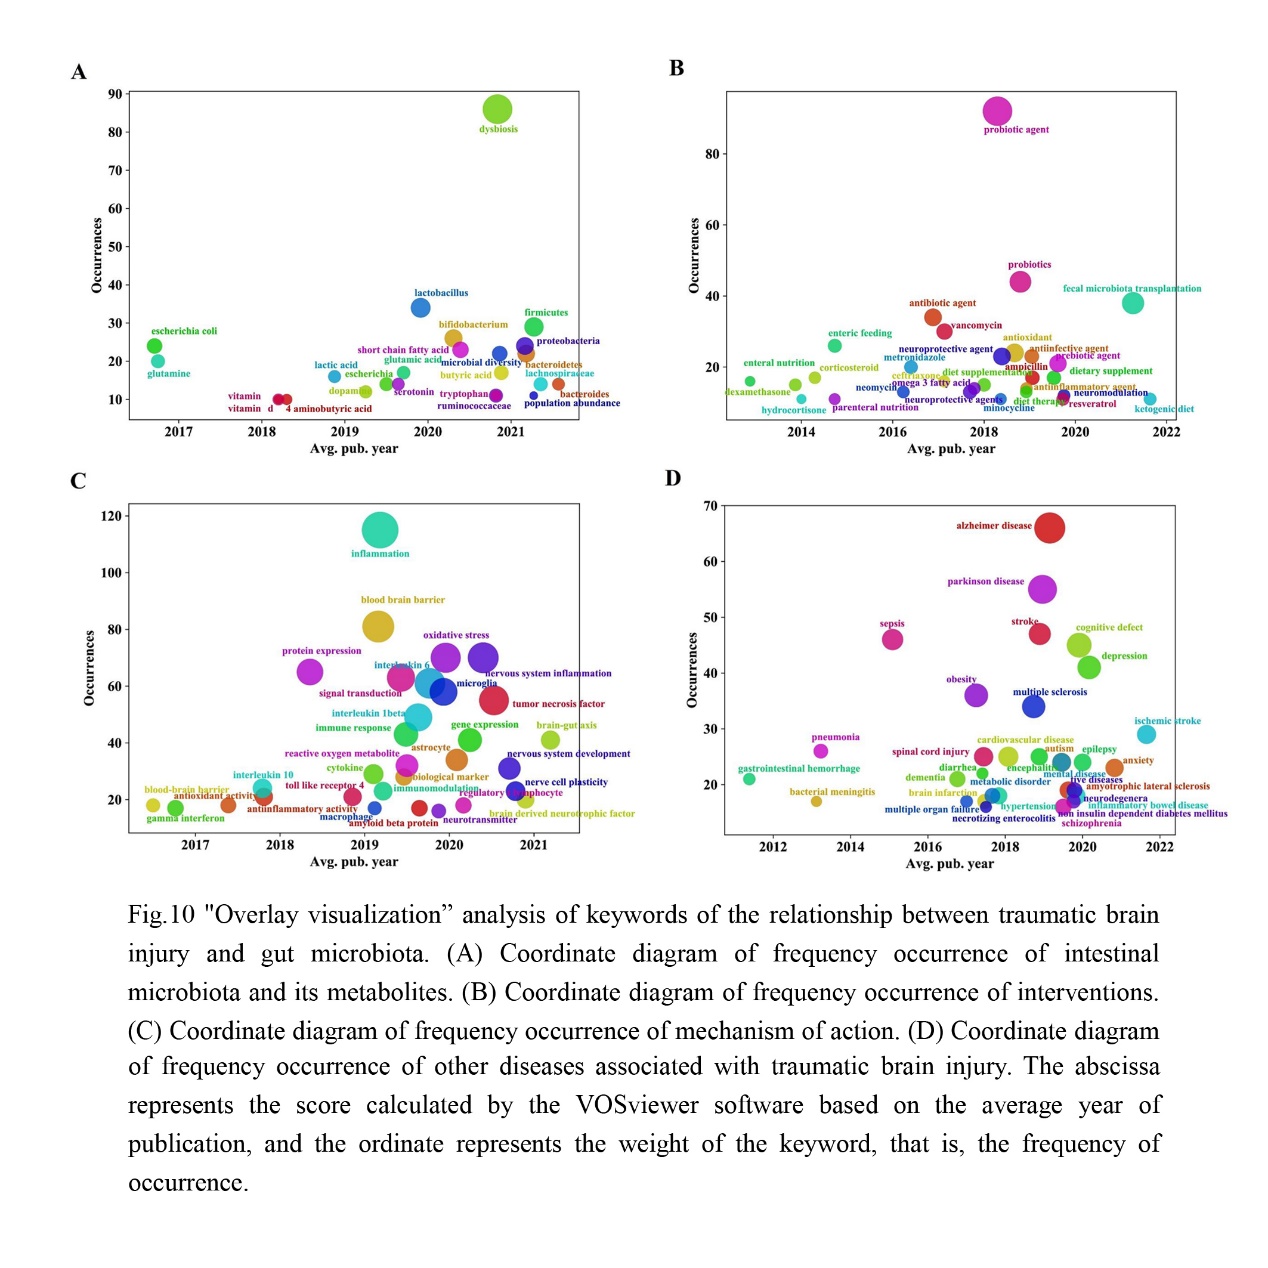

Supplement: Data_Sheet_1.DOCX [file Data_Sheet_1.DOCX]
